# Supplementary material
Source: PubMed Central journal article supplement (PMC2741694)

### **Supplementary Figure 1. Characterization of different forms of yeast Pho8**

(A) Immunoblot of lysates from *pho8* mutant cells and two independent cultures of wild type cells bearing pGAL1-PHO8 (labeled as WT #1 and WT #2).

Antibodies used detected Pho8, Vph1 as marker for the membrane fraction, and Pgk1 as a soluble fraction marker. Cells were cultured in LZM supplemented with 300  $\mu$ M ZnCl<sub>2</sub>. The cells were then harvested, lysed, and fractionated into membrane and soluble fractions. T represents total lysates, S for soluble fractions, and M for membrane fractions. Pho8 forms m1 and m2 are labeled.

The precursor (p) form of Pho8 was detectable with a longer exposure of the blot.

(B) ALP activities were measured for the corresponding fractions shown in panel A. The activities measured were then normalized to ALP activity units using the fraction of the total sample used in each assay and the initial OD<sub>600</sub> of the cells used for the preparations. Each value is the mean of duplicate samples.

Supplementary Figure 1

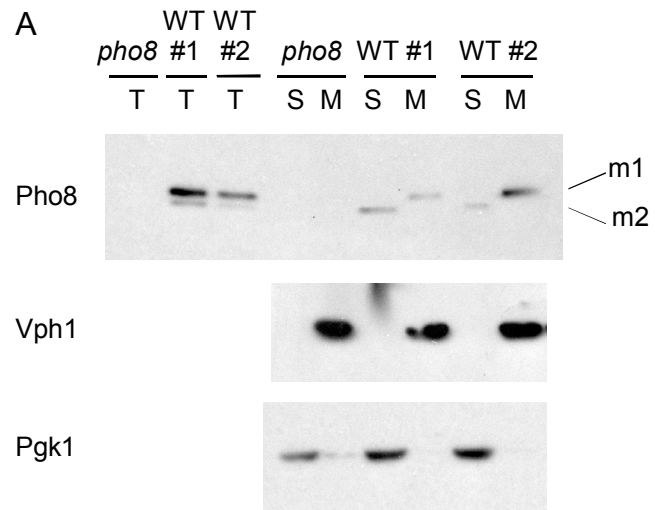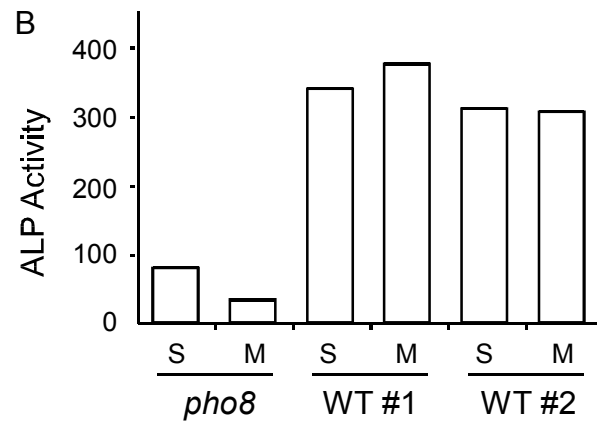

Supplement: NIHMS141593-supplement-Supplementary_Figure.pdf [file NIHMS141593-supplement-Supplementary_Figure.pdf]
